# Supplementary material for: Combined Steam and CO2 Reforming of Methane over Ni-Based CeO2-MgO Catalysts: Impacts of Preparation Mode and Pd Addition
Source: MDPI journal article supplement (doi:10.3390/app13084689), 2023-04-07
Supplement: s1 [file s1]

Archive with 1 entries (1 files):
- applsci-2317379-supplementary.pdf
